# Supplementary material
Source: Springer Nature journal article supplement (https://www.springermedizin.de/resource/supplementary/13012_2013_742_MOESM1_ESM.pdf/9630576)

**1a**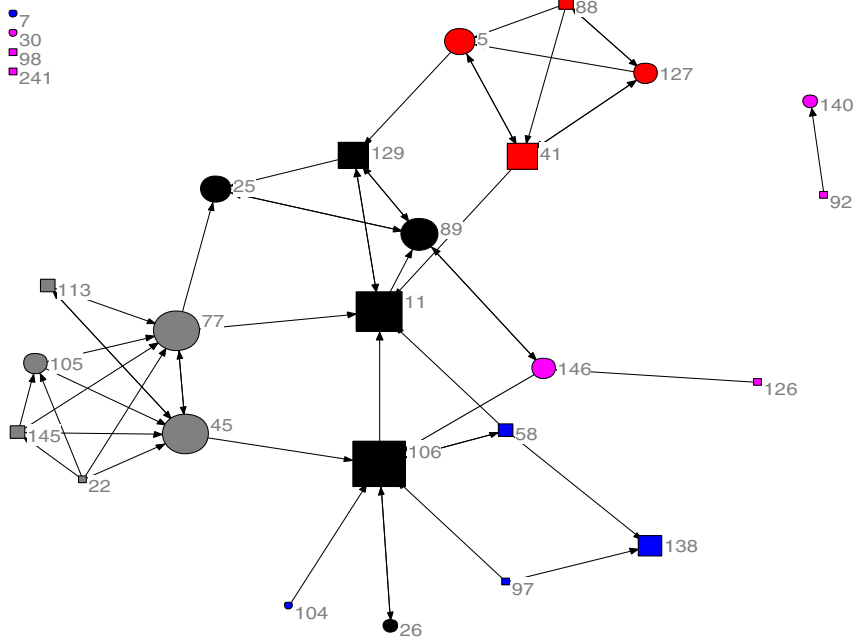**1b**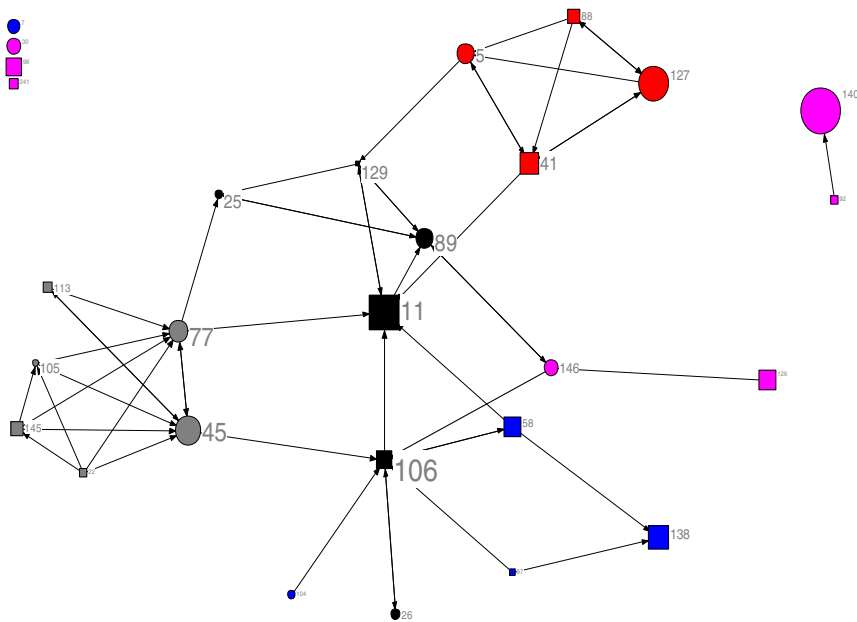

Supplement: MOESM1 [file 9630576]
